# Supplementary material
Source: publisher site journal article supplement (https://www.dovepress.com/article/448294)
Supplement: Supplementary file 1 [file get_supplementary_file.php]

Supplementary Table 1 The 45 frailty items and the coding rules

| NO. | Item                                                                                                                                     | Coding                                                 |       |
|-----|------------------------------------------------------------------------------------------------------------------------------------------|--------------------------------------------------------|-------|
| 1   | Body mass index (BMI)                                                                                                                    | BMI < 18.5 or ≥30.1: 1 30.1 < BMI≤18.5: 0              |       |
| 2   | Do you now have or have you ever had chronic lung diseases (COPD, asthma, bronchiectasis or ILD)?                                        | Yes: 1                                                 | No: 0 |
| 3   | Do you now have or have you ever had chronic respiratory failure?                                                                        | Yes: 1                                                 | No: 0 |
| 4   | Do you now have or have you ever had angina pectoris, myocardial infarction or recurrent chest tightness?                                | Yes: 1                                                 | No: 0 |
| 5   | Do you now have or have you ever had cardiac arrhythmia/atrial fibrillation?                                                             | Yes: 1                                                 | No: 0 |
| 6   | Do you now have or have you ever had heart failure?                                                                                      | Yes: 1                                                 | No: 0 |
| 7   | Do you now have or have you ever had hypertension?                                                                                       | Yes: 1                                                 | No: 0 |
| 8   | Do you now have or have you ever had the liver and biliary diseases (cirrhosis, abnormal liver function or biliary tract disease)?       | Yes: 1                                                 | No: 0 |
| 9   | Do you now have or have you ever had swallowing disorders?                                                                               | Severe degradation or none: 1 Degradation: 0.5 Good: 0 |       |
| 10  | Do you now have or have you ever had the gastric diseases (symptomatic chronic gastritis, gastric ulcer or functional dyspepsia)?        | Yes: 1                                                 | No: 0 |
| 11  | Do you now have or have you ever had bowel diseases (Crohn's disease, ulcerative colitis or severe constipation, or fecal incontinence)? | Yes: 1                                                 | No: 0 |
| 12  | Do you now have or have you ever had dysuria or urinary incontinence?                                                                    | Yes: 1                                                 | No: 0 |
| 13  | Do you now have or have you ever had kidney stones/CKD /recurrent urinary tract infections?                                              | Yes: 1                                                 | No: 0 |
| 14  | Do you now have or have you ever had renal failure with hemodialysis/abdominal dialysis/kidney transplantation?                          | Yes: 1                                                 | No: 0 |
| 15  | Do you now have or have you ever had osteoporosis?                                                                                       | Yes: 1                                                 | No: 0 |
| 16  | Do you now have or have you ever had diabetes mellitus?                                                                                  | Yes: 1                                                 | No: 0 |
| 17  | Do you now have or have you ever had thyroid disease (needing medication)                                                                | Yes: 1                                                 | No: 0 |

|    |                                                                                                        |                                |                                                                                        |
|----|--------------------------------------------------------------------------------------------------------|--------------------------------|----------------------------------------------------------------------------------------|
| 18 | Do you now have or have you ever had hyperlipidemia?                                                   | Yes: 1                         | No: 0                                                                                  |
| 19 | Do you now have or have you ever had gout?                                                             | Yes: 1                         | No: 0                                                                                  |
| 20 | Do you now have or have you ever had cerebral ischemia, stroke (bleeding or infarction), and sequelae? | Stroke and sequelae: 1         | Ischemia (TIA): 0.5 No: 0                                                              |
| 21 | Do you now have or have you ever had a migraine or dizziness?                                          | Yes: 1                         | No: 0                                                                                  |
| 22 | Do you now have or have you ever had Parkinson's disease?                                              | Yes: 1                         | No: 0                                                                                  |
| 23 | Do you now have or have you ever had sleep disorders?                                                  | Very poor: 1                   | Fair and good (no medication needed): 0                                                |
| 24 | Do you now have or have you ever had rheumatic diseases (CTD)?                                         | Yes: 1                         | No: 0                                                                                  |
| 25 | Do you now have or have you ever had persistent knee problems?                                         | Yes: 1                         | No: 0                                                                                  |
| 26 | Do you now have or have you ever had low back pain or cervical spondylosis?                            | Yes: 1                         | No: 0                                                                                  |
| 27 | Do you now have or have you ever had hip problems?                                                     | Yes: 1                         | No: 0                                                                                  |
| 28 | Do you now have or have you ever had an extremity disability?                                          | Yes: 1                         | No: 0                                                                                  |
| 29 | Do you now have or have you ever had hematologic diseases (anemia and others)?                         | Yes: 1                         | No: 0                                                                                  |
| 30 | Do you now have or have you ever had a malignant tumor or cancer?                                      | Yes: 1                         | No: 0                                                                                  |
| 31 | Do you now have or have you ever had other diseases(besides the diseases mentioned above )?            | Yes: 1                         | No: 0                                                                                  |
| 32 | Have you ever fallen frequently?                                                                       | Yes: 1                         | No: 0                                                                                  |
| 33 | Do you now have or have you ever had tinnitus?                                                         | Most of the time: 1            | Sometimes: 0.5 Rarely: 0                                                               |
| 34 | How is your vision?                                                                                    | Severe degeneration or none: 1 | Degeneration: 0.5 (presbyopia or vision loss) Good: 0                                  |
| 35 | How is your hearing?                                                                                   | Severe degeneration or none: 1 | Degeneration: 0.5 Good: 0                                                              |
| 36 | How is your dental chewing function?                                                                   | Severe degeneration or none: 1 | (loss of more than half of teeth) Degeneration: 0.5 (loss of 1/3-1/2 of teeth) Good: 0 |
| 37 | Don't you have the ability to bathe independently?                                                     | Yes: 1                         | No: 0                                                                                  |
| 38 | Don't you have the ability to dress independently?                                                     | Yes: 1                         | No: 0                                                                                  |

|    |                                                                    |                     |                           |
|----|--------------------------------------------------------------------|---------------------|---------------------------|
| 39 | Don't you have the ability to get up and sit independently?        | Yes: 1              | No: 0                     |
| 40 | Don't you have the ability to go to the toilet independently?      | Yes: 1              | No: 0                     |
| 41 | Don't you have the ability to go up and down stairs independently? | Yes: 1              | No: 0                     |
| 42 | Health self-assessment                                             | Poor: 1             | Fair: 0.5 Good: 0         |
| 43 | How has your health changed from the previous period?              | Getting worse: 1    | Getting better or fair: 0 |
| 44 | Did you feel depressed over 6 months?                              | Most of the time: 1 | Sometimes: 0.5 Rarely: 0  |
| 45 | Lost more than 9 pounds during this period.                        | Yes: 1              | No: 0                     |

Note. COPD: chronic obstructive pulmonary disease; ILD: Interstitial Lung Disease; CKD: Chronic Kidney Disease; TIA: Transient Ischemic Attacks; CTD: Connective Tissue Disease.

Supplementary Table 2 CAT scores in different frail statuses categorized using the three frailty instruments [median(IQR)]

|       | No-frail  | Pre-frail               | Frail                       | P-value |
|-------|-----------|-------------------------|-----------------------------|---------|
| FI    | 8(5, 12)  | 12(8, 17) <sup>a</sup>  | 18(15, 23.5) <sup>b,c</sup> | 0.001   |
| FRAIL | 9(6, 12)  | 16(11, 20) <sup>a</sup> | 24.5(16.5, 31) <sup>b</sup> | < 0.001 |
| CFS   | 3.5(0, 7) | 12(9, 16) <sup>a</sup>  | 22(17, 31) <sup>b,c</sup>   | < 0.001 |

P-values under 0.05 were statistically significant. IQR: interquartile range; FI: Frailty Index; FRAIL: frailty questionnaire; CFS: Clinical Frailty Scale.

"a" represents a statistically significant difference between "No-frail" and "Pre-frail"

"b" represents a statistically significant difference between "Pre-frail" and "Frail"

"c" represents a statistically significant difference between "No-frail" and "Frail"

Supplementary Table 3 The mMRC scores in different frail statuses using three frailty instruments [median(IQR)]

|       | No-frail | Pre-frail            | Frail                    | P-value |
|-------|----------|----------------------|--------------------------|---------|
| FI    | 1(1, 2)  | 2(1, 3) <sup>a</sup> | 3(2, 3) <sup>b,c</sup>   | < 0.001 |
| FRAIL | 2(1, 2)  | 2(1, 3) <sup>a</sup> | 3(2.5, 4) <sup>b,c</sup> | < 0.001 |
| CFS   | 1(0, 1)  | 2(1, 3)              | 3(2, 4) <sup>b,c</sup>   | < 0.001 |

P-values under 0.05 indicate statistical significance. IQR: interquartile range; FI: Frailty Index; FRAIL: frailty questionnaire; CFS: Clinical Frailty Scale;

"a" represents a statistically significant difference between "No-frail" and "Pre-frail"

"b" represents a statistically significant difference between "Pre-frail" and "Frail"

"c" represents a statistically significant difference between "No-frail" and "Frail"

Supplementary Table 4 Results of receiver operating characteristic curve analysis showing the ability of FI, FRAIL and CFS to predict acute exacerbations within 1 year in stable COPD patients

|       | sensitivity | specificity | Youden's index | cut-off |
|-------|-------------|-------------|----------------|---------|
| FI    | 0.747       | 0.560       | 0.307          | 0.106   |
| FRAIL | 0.295       | 0.960       | 0.255          | 1.500   |
| CFS   | 0.579       | 0.800       | 0.379          | 4.500   |

FI: Frailty Index; FRAIL: frailty questionnaire; CFS: Clinical Frailty Scale.
